# Supplementary material for: Validating Landsat Analysis Ready Data for Nearshore Sea Surface Temperature Monitoring in the Northeast Pacific
Source: MDPI journal article supplement (doi:10.3390/rs16050920), 2024-03-06
Supplement: s1 [file s1]

## Supplementary Material

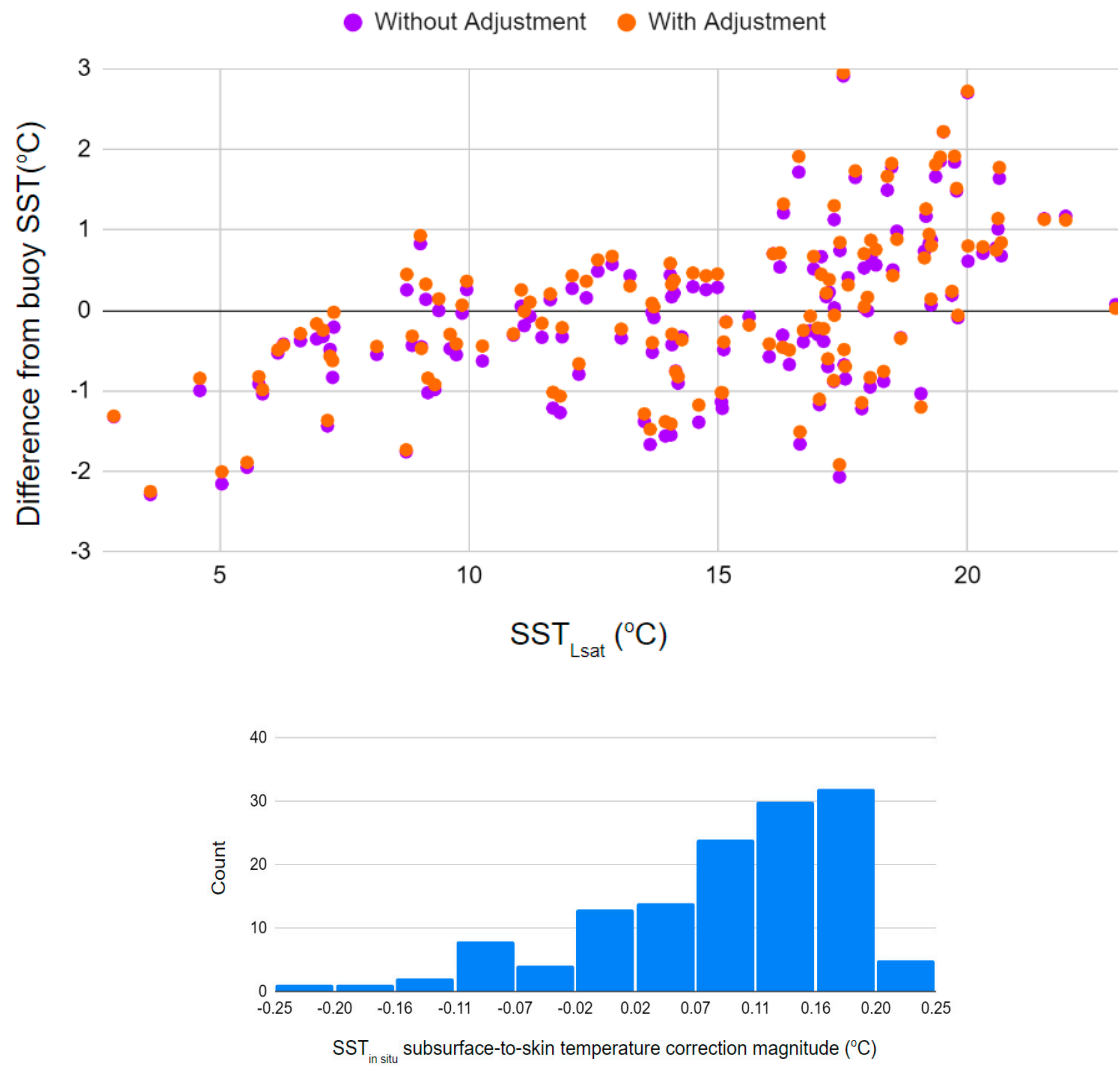

**Figure S1:** (Above) Results for buoy *in situ* SST adjustment from subsurface water temperature to skin water temperature based on formulas 1 and 2 adapted from Cook et al. [12] and Zeng et al. [38]. (Below) Distribution of subsurface-to-skin temperature adjustment magnitudes.
