# Supplementary material for: Validating Landsat Analysis Ready Data for Nearshore Sea Surface Temperature Monitoring in the Northeast Pacific
Source: MDPI journal article supplement (doi:10.3390/rs16050920), 2024-03-06
Supplement: s1 [file s1]

Archive with 1 entries (1 files):
- remotesensing-2894233-supplementary.pdf
